# Supplementary material for: A comparative cradle-to-gate life cycle assessment of three concrete mix designs
Source: Springer Nature journal article supplement (doi:10.1007/s11367-016-1045-5), 2016-02-05
Supplement: MOESM1 [file 7452470]

# APPENDICES

## APPENDIX A - Simapro LCA INPUTS

### LCA Input Table: Mix 1

| Known outputs to technosphere. Products and co-products         |                 |        |              |              |              |                       |         |         |
|-----------------------------------------------------------------|-----------------|--------|--------------|--------------|--------------|-----------------------|---------|---------|
| Name                                                            | Amount          | Unit   | Quantity     | Allocation % | Waste type   | Category              | Comment |         |
| CEM I CONCRETE                                                  | 2406            | kg     | Mass         | 100 %        | not defined  | Construction\Concrete |         |         |
| Known outputs to technosphere. Avoided products                 |                 |        |              |              |              |                       |         |         |
| Name                                                            | Amount          | Unit   | Distribution | SD^2 or 2*SD | Min          | Max                   | Comment |         |
| Inputs                                                          |                 |        |              |              |              |                       |         |         |
| Known inputs from nature (resources)                            |                 |        |              |              |              |                       |         |         |
| Name                                                            | Sub-compartment | Amount | Unit         | Distribution | SD^2 or 2*SD | Min                   | Max     | Comment |
| Known inputs from technosphere (materials/fuels)                |                 |        |              |              |              |                       |         |         |
| Name                                                            | Amount          | Unit   | Distribution | SD^2 or 2*SD | Min          | Max                   | Comment |         |
| Portland cement, strength class Z 42.5, at plant/CH U           | 380             | kg     | Undefined    |              |              |                       |         |         |
| Limestone, crushed, for mill/CH U                               | 1028            | kg     | Undefined    |              |              |                       |         |         |
| Sand, at mine/CH U                                              | 806             | kg     | Undefined    |              |              |                       |         |         |
| Polycarboxylates, 40% active substance, at plant/RER S          | 2               | kg     | Undefined    |              |              |                       |         |         |
| Tap water, at user/CH U                                         | 190             | kg     | Undefined    |              |              |                       |         |         |
| Transport, lorry 20-28t, fleet average/CH U                     | 79.42           | tkm    | Undefined    |              |              |                       |         |         |
| Known inputs from technosphere (electricity/heat)               |                 |        |              |              |              |                       |         |         |
| Name                                                            | Amount          | Unit   | Distribution | SD^2 or 2*SD | Min          | Max                   | Comment |         |
| Outputs                                                         |                 |        |              |              |              |                       |         |         |
| Emissions to air                                                |                 |        |              |              |              |                       |         |         |
| Name                                                            | Sub-compartment | Amount | Unit         | Distribution | SD^2 or 2*SD | Min                   | Max     | Comment |
| Emissions to water                                              |                 |        |              |              |              |                       |         |         |
| Name                                                            | Sub-compartment | Amount | Unit         | Distribution | SD^2 or 2*SD | Min                   | Max     | Comment |
| Emissions to soil                                               |                 |        |              |              |              |                       |         |         |
| Name                                                            | Sub-compartment | Amount | Unit         | Distribution | SD^2 or 2*SD | Min                   | Max     | Comment |
| Final waste flows                                               |                 |        |              |              |              |                       |         |         |
| Name                                                            | Sub-compartment | Amount | Unit         | Distribution | SD^2 or 2*SD | Min                   | Max     | Comment |
| Non material emissions                                          |                 |        |              |              |              |                       |         |         |
| Name                                                            | Sub-compartment | Amount | Unit         | Distribution | SD^2 or 2*SD | Min                   | Max     | Comment |
| Social issues                                                   |                 |        |              |              |              |                       |         |         |
| Name                                                            | Sub-compartment | Amount | Unit         | Distribution | SD^2 or 2*SD | Min                   | Max     | Comment |
| Economic issues                                                 |                 |        |              |              |              |                       |         |         |
| Name                                                            | Sub-compartment | Amount | Unit         | Distribution | SD^2 or 2*SD | Min                   | Max     | Comment |
| Known outputs to technosphere. Waste and emissions to treatment |                 |        |              |              |              |                       |         |         |
| Name                                                            | Amount          | Unit   | Distribution | SD^2 or 2*SD | Min          | Max                   | Comment |         |
| Disposal, concrete, 5% water, to inert material landfill/CH U   | 16              | kg     | Undefined    |              |              |                       |         |         |

## LCA Input Table: Mix 2

| Known outputs to technosphere. Products and co-products         |                 |        |              |              |              |                      |         |         |
|-----------------------------------------------------------------|-----------------|--------|--------------|--------------|--------------|----------------------|---------|---------|
| Name                                                            | Amount          | Unit   | Quantity     | Allocation % | Waste type   | Category             | Comment |         |
| CEM III/B CONCRETE                                              | 2392            | kg     | Mass         | 100 %        | not defined  | ConstructionConcrete |         |         |
| Known outputs to technosphere. Avoided products                 |                 |        |              |              |              |                      |         |         |
| Name                                                            | Amount          | Unit   | Distribution | SD^2 or 2*SD | Min          | Max                  | Comment |         |
| Inputs                                                          |                 |        |              |              |              |                      |         |         |
| Known inputs from nature (resources)                            |                 |        |              |              |              |                      |         |         |
| Name                                                            | Sub-compartment | Amount | Unit         | Distribution | SD^2 or 2*SD | Min                  | Max     | Comment |
| Known inputs from technosphere (materials/fuels)                |                 |        |              |              |              |                      |         |         |
| Name                                                            | Amount          | Unit   | Distribution | SD^2 or 2*SD | Min          | Max                  | Comment |         |
| Portland cement, strength class Z 42.5, at plant/CH U           | 114             | kg     | Undefined    |              |              |                      |         |         |
| Limestone, crushed, for mill/CH U                               | 1020            | kg     | Undefined    |              |              |                      |         |         |
| Sand, at mine/CH U                                              | 800             | kg     | Undefined    |              |              |                      |         |         |
| Polycarboxylates, 49% active substance, at plant/RER 5          | 2               | kg     | Undefined    |              |              |                      |         |         |
| Tap water, at user/CH U                                         | 190             | kg     | Undefined    |              |              |                      |         |         |
| Transport, lorry 20-28t, fleet average/CH U                     | 23.826          | tkm    | Undefined    |              |              |                      |         |         |
| Transport, lorry 20-28t, fleet average/CH U                     | 116.774         | tkm    | Undefined    |              |              |                      |         |         |
| Known inputs from technosphere (electricity/heat)               |                 |        |              |              |              |                      |         |         |
| Name                                                            | Amount          | Unit   | Distribution | SD^2 or 2*SD | Min          | Max                  | Comment |         |
| Outputs                                                         |                 |        |              |              |              |                      |         |         |
| Emissions to air                                                |                 |        |              |              |              |                      |         |         |
| Name                                                            | Sub-compartment | Amount | Unit         | Distribution | SD^2 or 2*SD | Min                  | Max     | Comment |
| Emissions to water                                              |                 |        |              |              |              |                      |         |         |
| Name                                                            | Sub-compartment | Amount | Unit         | Distribution | SD^2 or 2*SD | Min                  | Max     | Comment |
| Emissions to soil                                               |                 |        |              |              |              |                      |         |         |
| Name                                                            | Sub-compartment | Amount | Unit         | Distribution | SD^2 or 2*SD | Min                  | Max     | Comment |
| Final waste flows                                               |                 |        |              |              |              |                      |         |         |
| Name                                                            | Sub-compartment | Amount | Unit         | Distribution | SD^2 or 2*SD | Min                  | Max     | Comment |
| Non material emissions                                          |                 |        |              |              |              |                      |         |         |
| Name                                                            | Sub-compartment | Amount | Unit         | Distribution | SD^2 or 2*SD | Min                  | Max     | Comment |
| Social issues                                                   |                 |        |              |              |              |                      |         |         |
| Name                                                            | Sub-compartment | Amount | Unit         | Distribution | SD^2 or 2*SD | Min                  | Max     | Comment |
| Economic issues                                                 |                 |        |              |              |              |                      |         |         |
| Name                                                            | Sub-compartment | Amount | Unit         | Distribution | SD^2 or 2*SD | Min                  | Max     | Comment |
| Known outputs to technosphere. Waste and emissions to treatment |                 |        |              |              |              |                      |         |         |
| Name                                                            | Amount          | Unit   | Distribution | SD^2 or 2*SD | Min          | Max                  | Comment |         |
| Disposal, concrete, 5% water, to inert material landfill/CH U   | 16              | kg     | Undefined    |              |              |                      |         |         |

## LCA Input Table: Mix 3

| Known outputs to technosphere. Products and co-products         |                 |        |              |              |              |                      |         |         |
|-----------------------------------------------------------------|-----------------|--------|--------------|--------------|--------------|----------------------|---------|---------|
| Name                                                            | Amount          | Unit   | Quantity     | Allocation % | Waste type   | Category             | Comment |         |
| CEM II/B-V CONCRETE                                             | 2379            | kg     | Mass         | 100 %        | not defined  | ConstructionConcrete |         |         |
| Known outputs to technosphere. Avoided products                 |                 |        |              |              |              |                      |         |         |
| Name                                                            | Amount          | Unit   | Distribution | SD^2 or 2*SD | Min          | Max                  | Comment |         |
| Inputs                                                          |                 |        |              |              |              |                      |         |         |
| Known inputs from nature (resources)                            |                 |        |              |              |              |                      |         |         |
| Name                                                            | Sub-compartment | Amount | Unit         | Distribution | SD^2 or 2*SD | Min                  | Max     | Comment |
| Known inputs from technosphere (materials/fuels)                |                 |        |              |              |              |                      |         |         |
| Name                                                            | Amount          | Unit   | Distribution | SD^2 or 2*SD | Min          | Max                  | Comment |         |
| Portland cement, strength class Z 42.5, at plant/CH U           | 247             | kg     | Undefined    |              |              |                      |         |         |
| Limestone, crushed, for mill/CH U                               | 1013            | kg     | Undefined    |              |              |                      |         |         |
| Sand, at mine/CH U                                              | 794             | kg     | Undefined    |              |              |                      |         |         |
| Polycarboxylates, 40% active substance, at plant/RER 5          | 2               | kg     | Undefined    |              |              |                      |         |         |
| Tap water, at user/CH U                                         | 190             | kg     | Undefined    |              |              |                      |         |         |
| Transport, lorry 20-28t, fleet average/CH U                     | 51.623          | tkm    | Undefined    |              |              |                      |         |         |
| Transport, lorry 20-28t, fleet average/CH U                     | 41.762          | tkm    | Undefined    |              |              |                      |         |         |
| Known inputs from technosphere (electricity/heat)               |                 |        |              |              |              |                      |         |         |
| Name                                                            | Amount          | Unit   | Distribution | SD^2 or 2*SD | Min          | Max                  | Comment |         |
| Outputs                                                         |                 |        |              |              |              |                      |         |         |
| Emissions to air                                                |                 |        |              |              |              |                      |         |         |
| Name                                                            | Sub-compartment | Amount | Unit         | Distribution | SD^2 or 2*SD | Min                  | Max     | Comment |
| Emissions to water                                              |                 |        |              |              |              |                      |         |         |
| Name                                                            | Sub-compartment | Amount | Unit         | Distribution | SD^2 or 2*SD | Min                  | Max     | Comment |
| Emissions to soil                                               |                 |        |              |              |              |                      |         |         |
| Name                                                            | Sub-compartment | Amount | Unit         | Distribution | SD^2 or 2*SD | Min                  | Max     | Comment |
| Final waste flows                                               |                 |        |              |              |              |                      |         |         |
| Name                                                            | Sub-compartment | Amount | Unit         | Distribution | SD^2 or 2*SD | Min                  | Max     | Comment |
| Non material emissions                                          |                 |        |              |              |              |                      |         |         |
| Name                                                            | Sub-compartment | Amount | Unit         | Distribution | SD^2 or 2*SD | Min                  | Max     | Comment |
| Social issues                                                   |                 |        |              |              |              |                      |         |         |
| Name                                                            | Sub-compartment | Amount | Unit         | Distribution | SD^2 or 2*SD | Min                  | Max     | Comment |
| Economic issues                                                 |                 |        |              |              |              |                      |         |         |
| Name                                                            | Sub-compartment | Amount | Unit         | Distribution | SD^2 or 2*SD | Min                  | Max     | Comment |
| Known outputs to technosphere. Waste and emissions to treatment |                 |        |              |              |              |                      |         |         |
| Name                                                            | Amount          | Unit   | Distribution | SD^2 or 2*SD | Min          | Max                  | Comment |         |
| Disposal, concrete, 5% water, to inert material landfill/CH U   | 16              | kg     | Undefined    |              |              |                      |         |         |

## APPENDIX B - MIX DESIGN YIELD CHECKS

| Materials                      | Mix 1: CEM I<br>(kg/m <sup>3</sup> ) | Relative Density<br>(SSD) | Yield check<br>(m <sup>3</sup> ) |
|--------------------------------|--------------------------------------|---------------------------|----------------------------------|
| PC                             | 380                                  | 3.12                      | 0.122                            |
| 10/20mm Limestone<br>Aggregate | 615                                  | 2.70                      | 0.228                            |
| 4/10mm Limestone<br>Aggregate  | 413                                  | 2.70                      | 0.153                            |
| 0-4mm Fine Aggregate           | 806                                  | 2.65                      | 0.304                            |
| Plasticiser                    | 2                                    | 1.00                      | 0.002                            |
| Water                          | 190                                  | 1.00                      | 0.190                            |
| <b>Theoretical Density:</b>    | <b>2406</b>                          | <b>Total Yield:</b>       | <b>0.999</b>                     |

| Materials                      | Mix 2: CEMII/B-V<br>(kg/m <sup>3</sup> ) | Relative Density<br>(SSD) | Yield check<br>(m <sup>3</sup> ) |
|--------------------------------|------------------------------------------|---------------------------|----------------------------------|
| PC                             | 247                                      | 3.12                      | 0.0792                           |
| FA                             | 133                                      | 2.30                      | 0.058                            |
| 10/20mm Limestone<br>Aggregate | 606                                      | 2.70                      | 0.224                            |
| 4/10mm Limestone<br>Aggregate  | 407                                      | 2.70                      | 0.151                            |
| 0-4mm Fine Aggregate           | 794                                      | 2.65                      | 0.298                            |
| Plasticiser                    | 2                                        | 1.00                      | 0.002                            |
| Water                          | 190                                      | 1.00                      | 0.190                            |
| <b>Theoretical Density:</b>    | <b>2379</b>                              | <b>Total Yield:</b>       | <b>1.002</b>                     |

| Materials                      | Mix 3:CEMIII/B<br>(kg/m <sup>3</sup> ) | Relative Density<br>(SSD) | Yield check<br>(m <sup>3</sup> ) |
|--------------------------------|----------------------------------------|---------------------------|----------------------------------|
| PC                             | 114                                    | 3.12                      | 0.037                            |
| GGBS                           | 266                                    | 2.90                      | 0.092                            |
| 10/20mm Limestone<br>Aggregate | 610                                    | 2.70                      | 0.226                            |
| 4/10mm Limestone<br>Aggregate  | 410                                    | 2.70                      | 0.152                            |
| 0-4mm Fine<br>Aggregate        | 800                                    | 2.65                      | 0.301                            |
| Plasticiser                    | 2                                      | 1.00                      | 0.002                            |
| Water                          | 190                                    | 1.00                      | 0.190                            |
| <b>Theoretical Density:</b>    | <b>2392</b>                            | <b>Total:</b>             | <b>1.000</b>                     |

# APPENDIX C – LCA RESULTS BY DAMAGE CATEGORY

## Eco-indicator 99 Impact Assessment: Normalisation

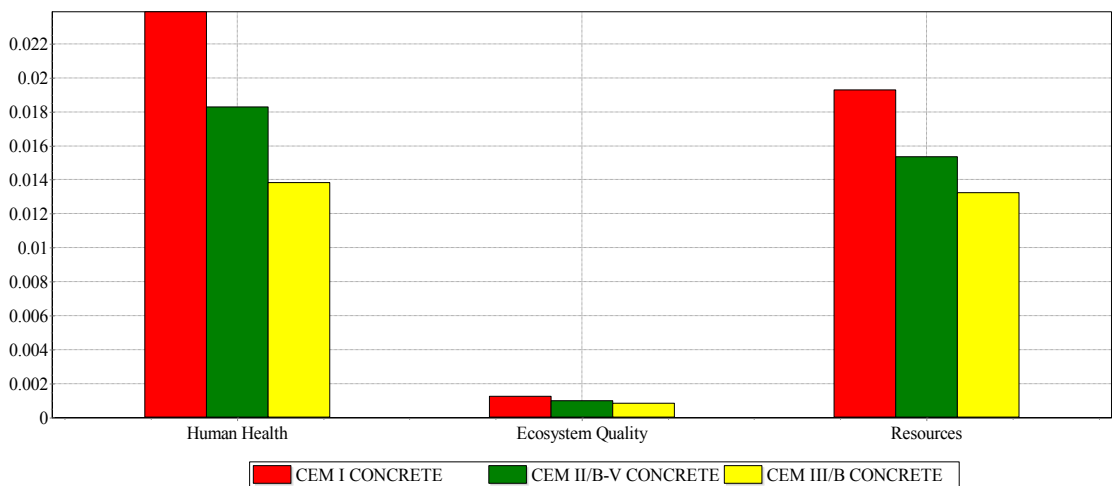

## Eco-indicator 99 Impact Assessment: Damage Assessment.

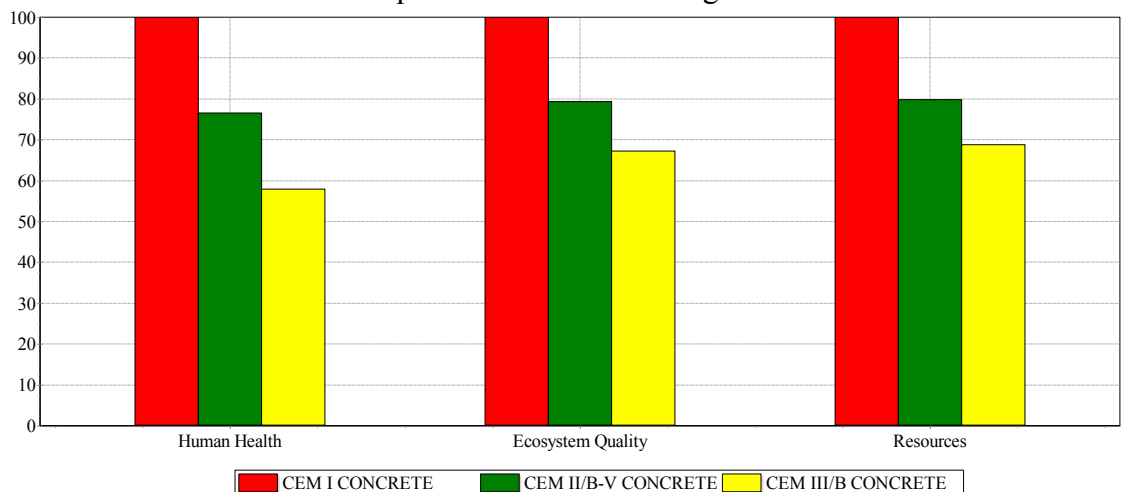

## Eco-indicator 99 Impact Assessment: Weighting.

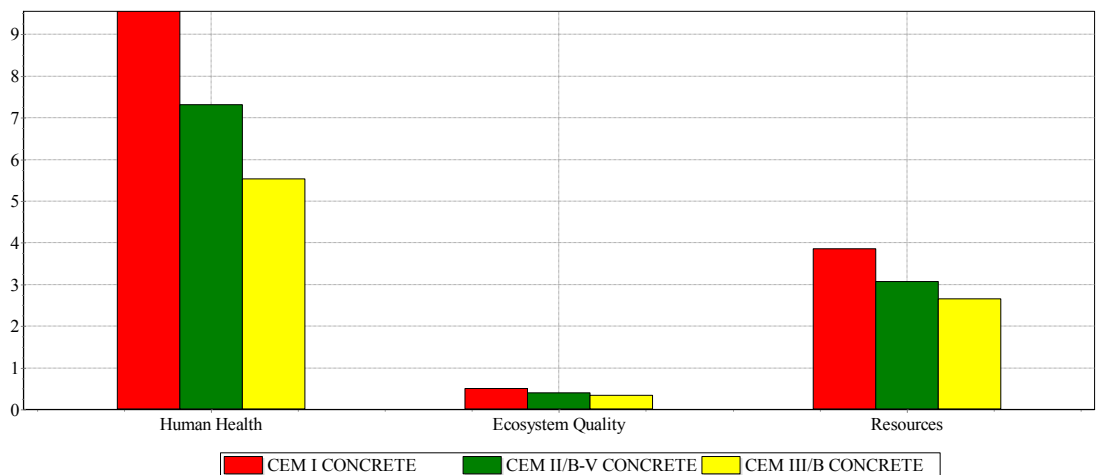

### Eco-indicator 99 Impact Assessment: Single Score.

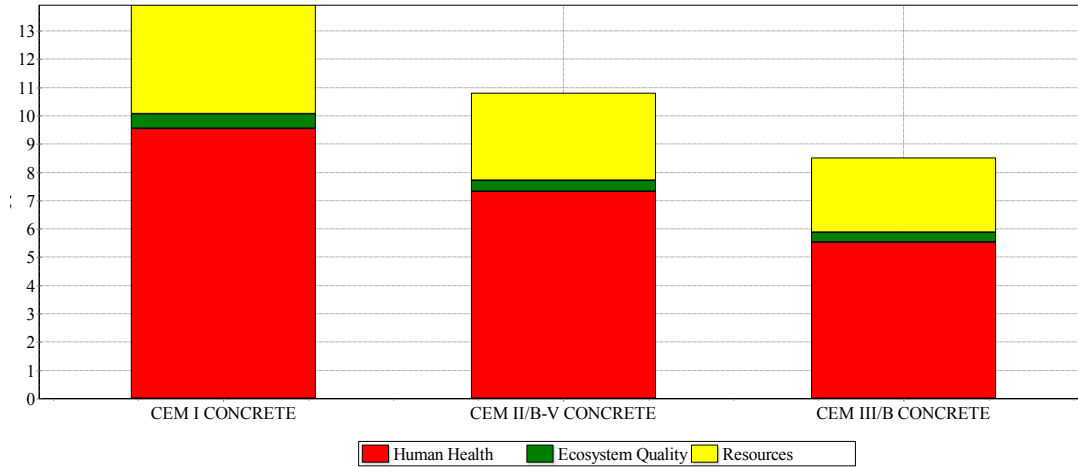

### Tables:

#### Eco-indicator 99 Impact Assessment Table: Damage Assessment.

| Sel                                 | Damage category   | Unit       | CEM I CONCRETE | CEM II/B-V CONCRETE | CEM III/B CONCRETE |
|-------------------------------------|-------------------|------------|----------------|---------------------|--------------------|
| <input checked="" type="checkbox"/> | Human Health      | DALY       | 0.000209       | 0.00016             | 0.000121           |
| <input checked="" type="checkbox"/> | Ecosystem Quality | PDF*m2yr   | 7.19           | 5.71                | 4.83               |
| <input checked="" type="checkbox"/> | Resources         | MJ surplus | 145            | 116                 | 100                |

#### Eco-indicator 99 Impact Assessment Table: Normalisation.

| Sel                                 | Damage category   | Unit | CEM I CONCRETE | CEM II/B-V CONCRETE | CEM III/B CONCRETE |
|-------------------------------------|-------------------|------|----------------|---------------------|--------------------|
| <input checked="" type="checkbox"/> | Human Health      |      | 0.0239         | 0.0183              | 0.0138             |
| <input checked="" type="checkbox"/> | Ecosystem Quality |      | 0.00126        | 0.000997            | 0.000845           |
| <input checked="" type="checkbox"/> | Resources         |      | 0.0193         | 0.0154              | 0.0132             |

#### Eco-indicator 99 Impact Assessment Table: Weighting/Single Score.

| Sel                                 | Damage category   | Unit | CEM I CONCRETE | CEM II/B-V CONCRETE | CEM III/B CONCRETE |
|-------------------------------------|-------------------|------|----------------|---------------------|--------------------|
|                                     | Total             | Pt   | 13.9           | 10.8                | 8.52               |
| <input checked="" type="checkbox"/> | Human Health      | Pt   | 9.55           | 7.32                | 5.53               |
| <input checked="" type="checkbox"/> | Ecosystem Quality | Pt   | 0.502          | 0.399               | 0.338              |
| <input checked="" type="checkbox"/> | Resources         | Pt   | 3.85           | 3.07                | 2.65               |
